# Supplementary material
Source: PubMed Central journal article supplement (PMC4689660)
Supplement: NIHMS737278-supplement.pdf [file NIHMS737278-supplement.pdf]

## Supplementary Figure S1

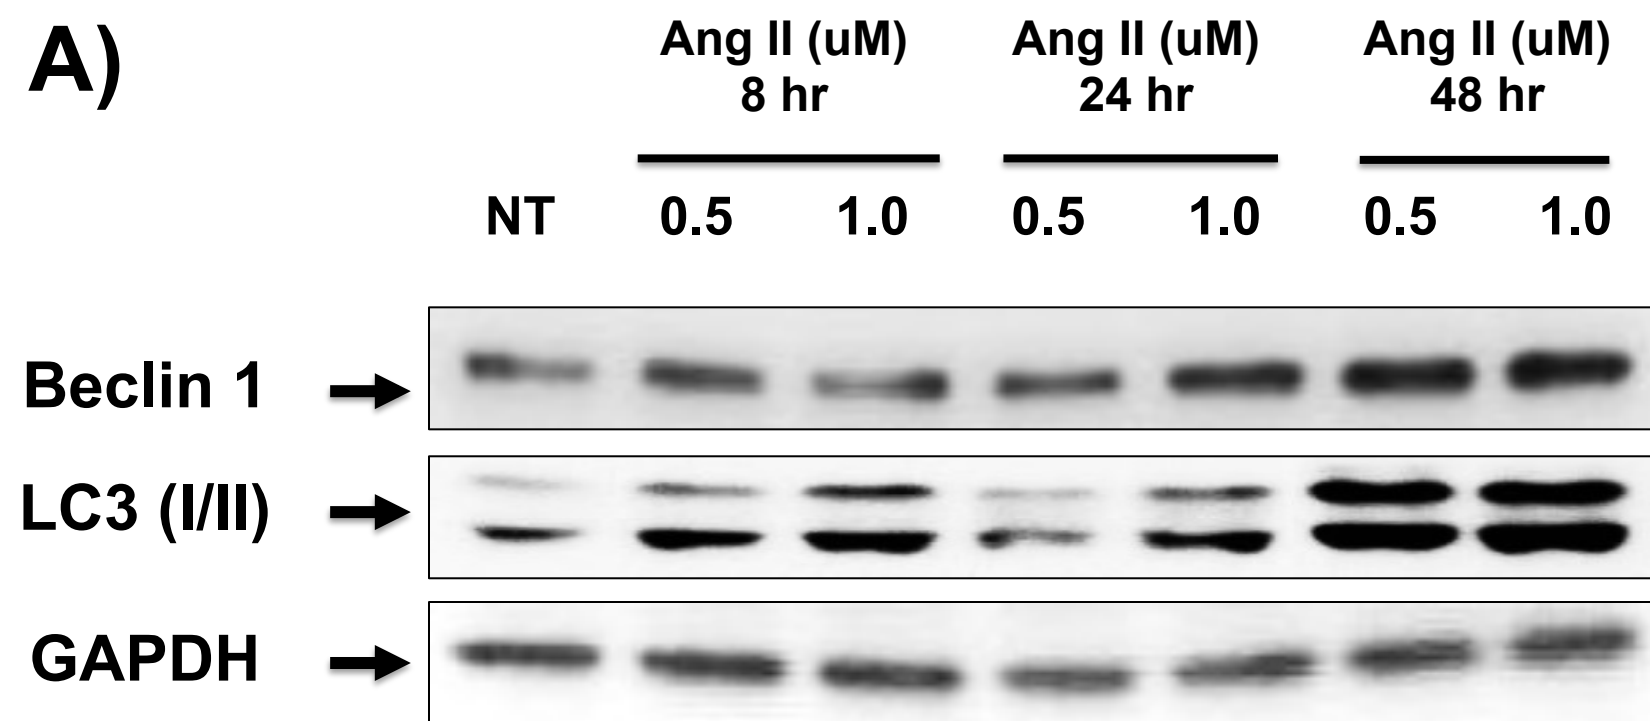

**Supplementary Figure S1: Acute long-term Ang II treatment induced pathological autophagy in neonatal rat ventricular myocytes (NRVM):** NRVM were isolated from 1-2 days old rat pups. Cells were treated with Ang II for 48 hours in low serum (LS) media. **A)** Dose and time response for Ang II in NRVM for autophagy were analyzed by western blotting. Maximum activation of autophagy was observed at 1 uM dose of Ang II for 48 hours. GAPDH/ $\beta$ -actin were used as internal control. N=3

## Supplementary Figure S2

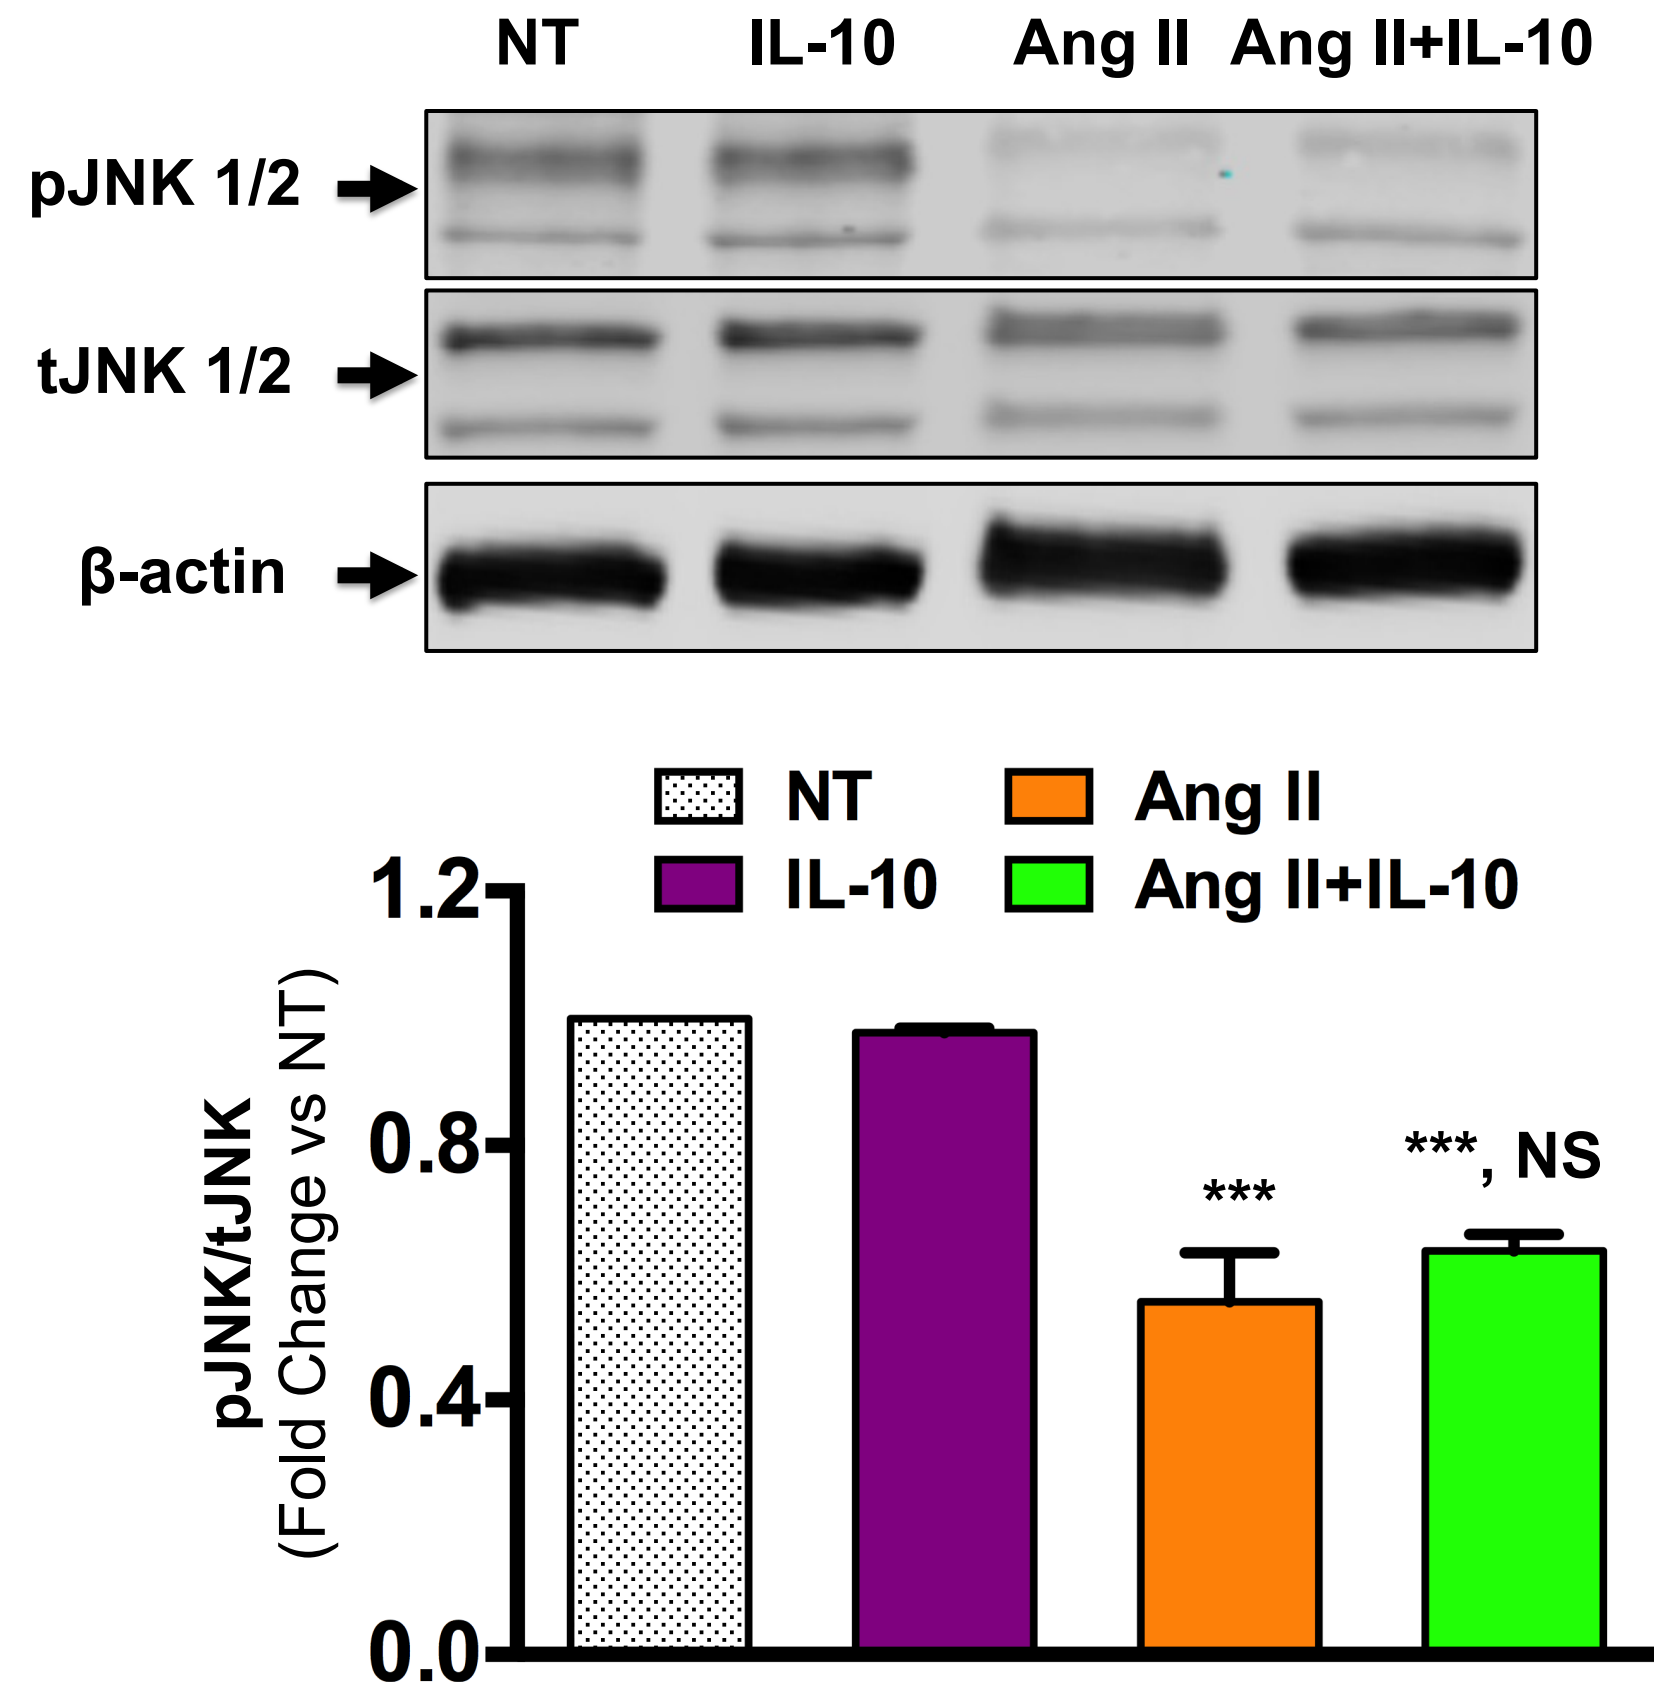

**Supplementary Figure S2: Acute long-term Ang II treatment induced inhibits JNK1/2 signaling in neonatal rat ventricular myocytes (NRVM):** NRVM were isolated from 1-2 days old rat pups. Cells were treated with Ang II and IL-10 for 48 hours in low serum (LS) media. **A&B)** Cells lysate were prepared from cells after treatment and used for western blot using JNK1/2 antibodies. Prolong Ang II treatment inhibits JNK1/2 phosphorylation. IL-10 treatment were unable to rescued Ang II-induced JNK inhibition.  $\beta$ -actin were used as internal control. N=3

## Supplementary Figure S3

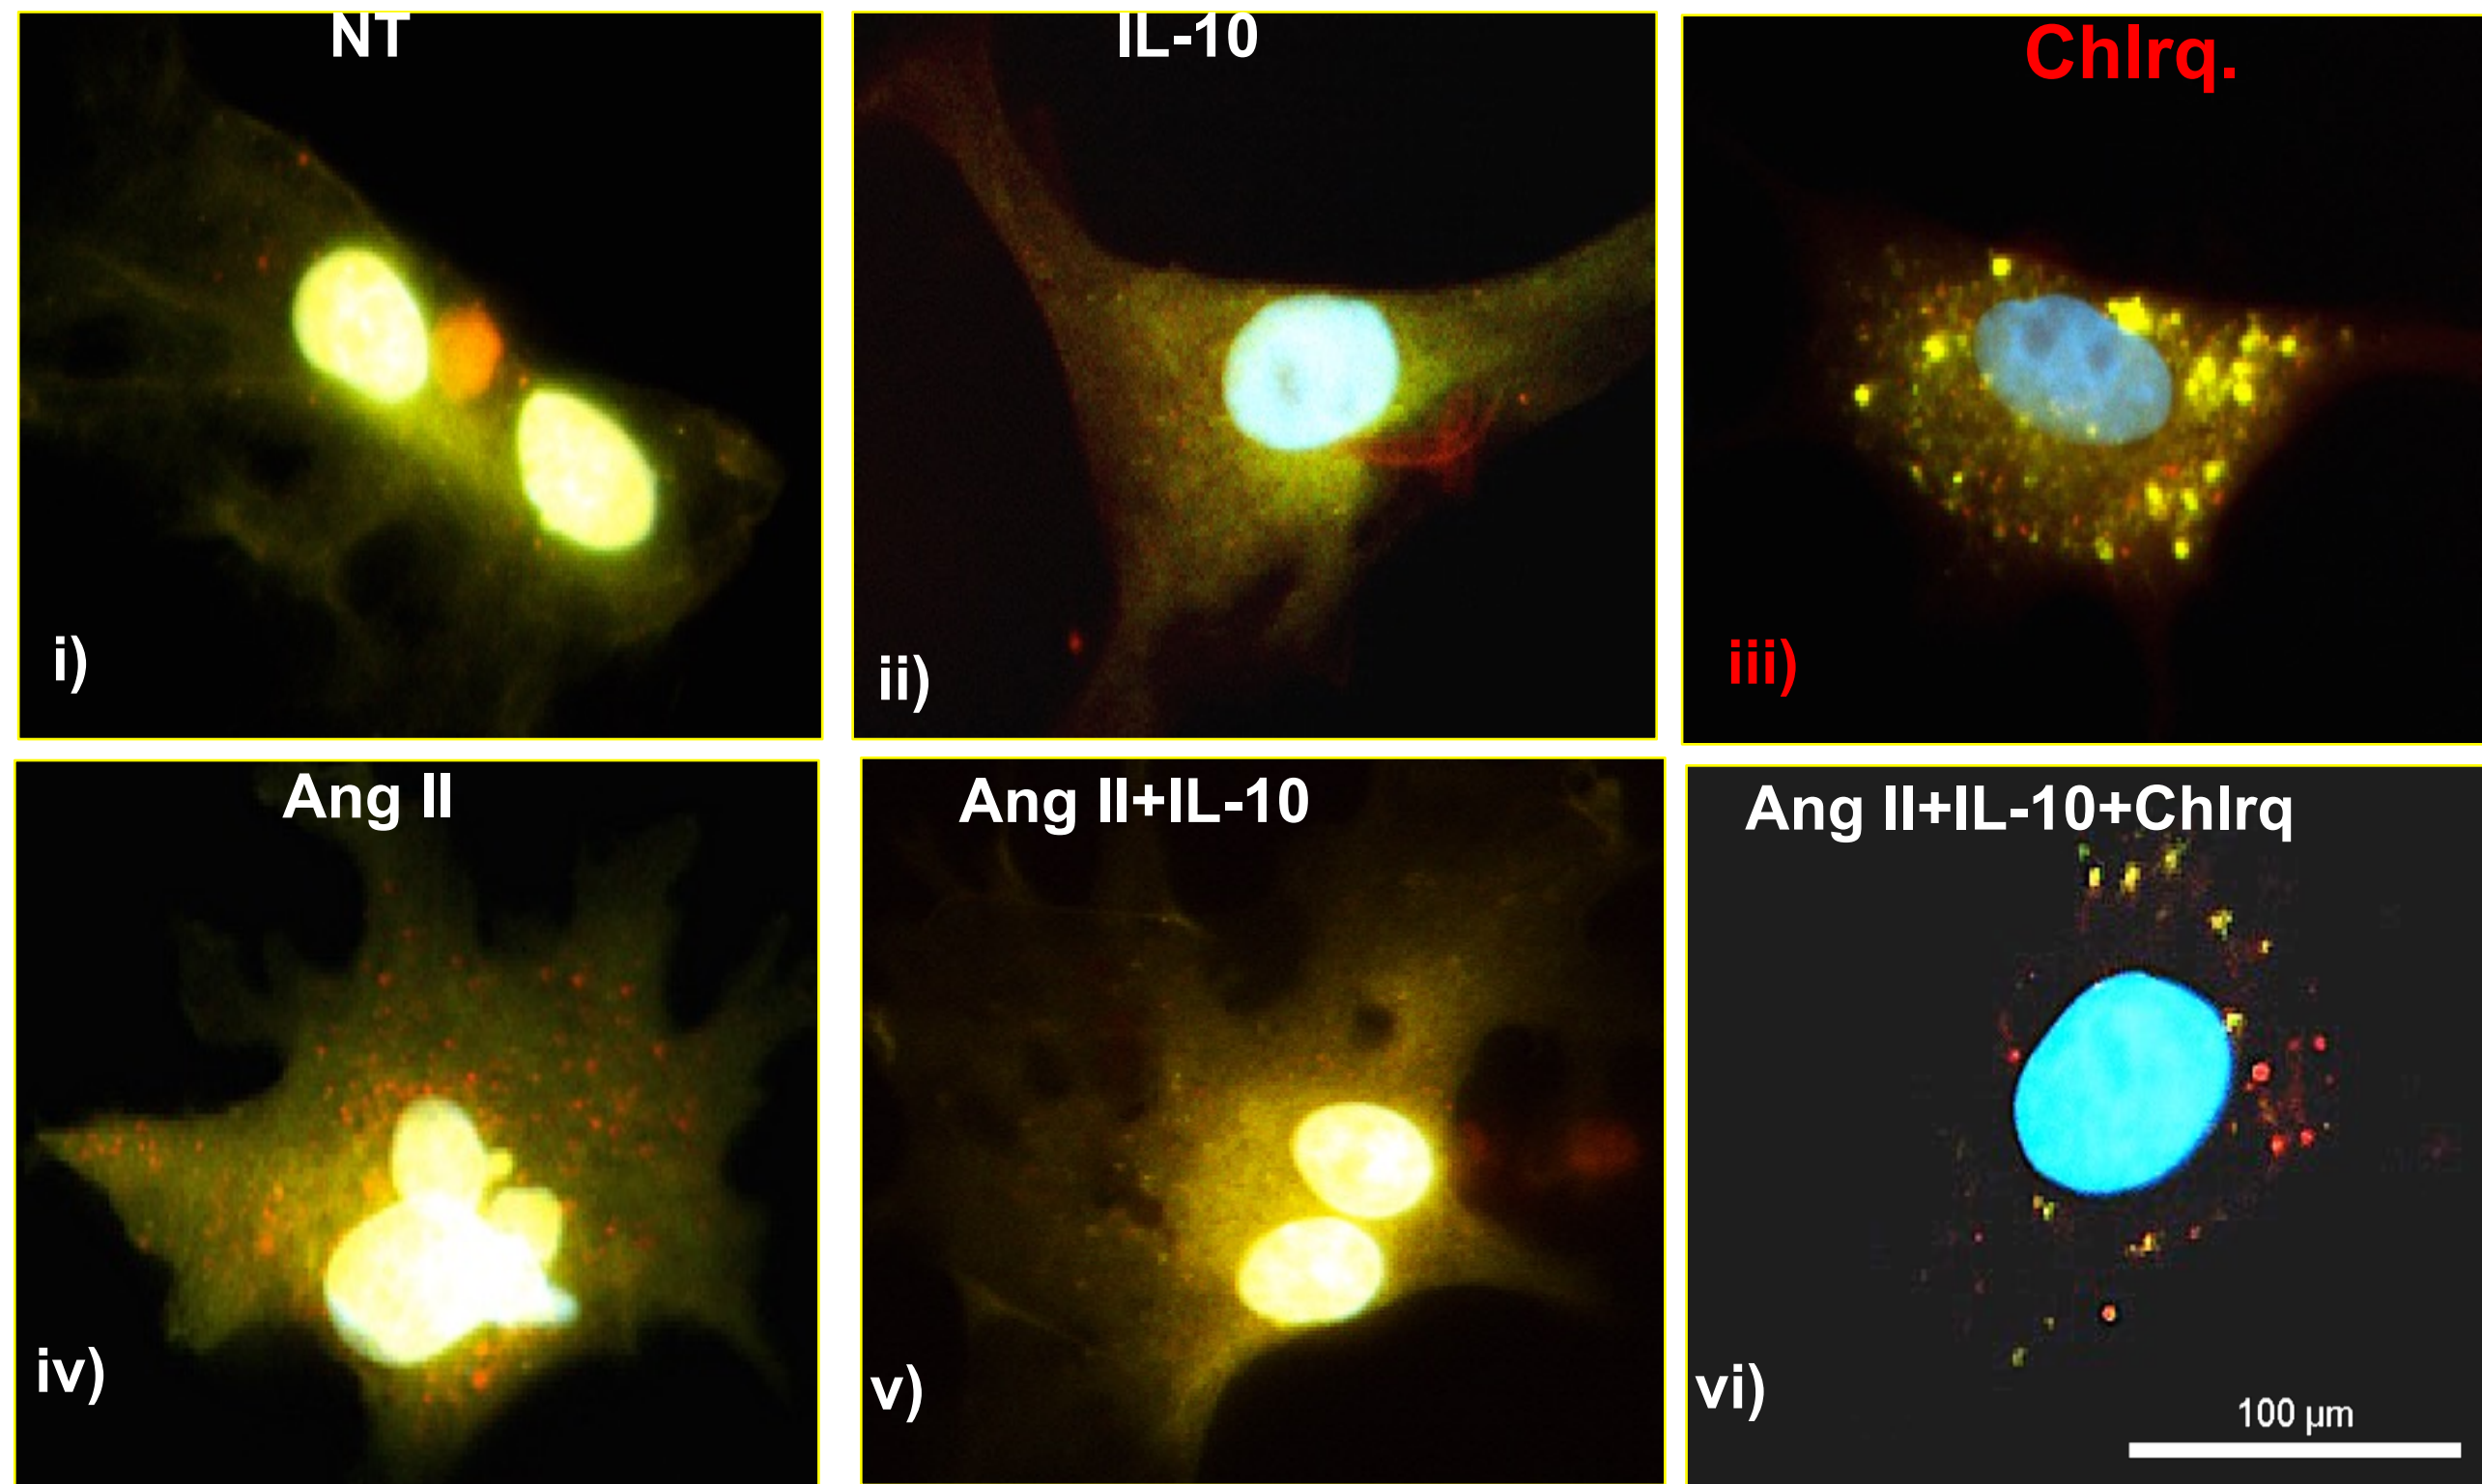

**Supplementary Figure S3: IL-10 attenuated Ang II-induced autophagy: i-vi)** Chloroquine were used to interrupt the progress of autophagy to see the actual role of IL-10. Chloroquine treatment does not affect autophagic flux in IL-10 treated cells conformed the anti-autophagic effect of IL-10. Bar graph indicates mean number of autophagosome (empty box) and autolysosome (filled box) per cell. Scale bar, 100 um and original magnification was 400X with oil emulsion. GFP: green fluorescent protein, RFP: red fluorescent protein, Chlrq: chloroquine. N=3-4



# Supplementary Figure S4

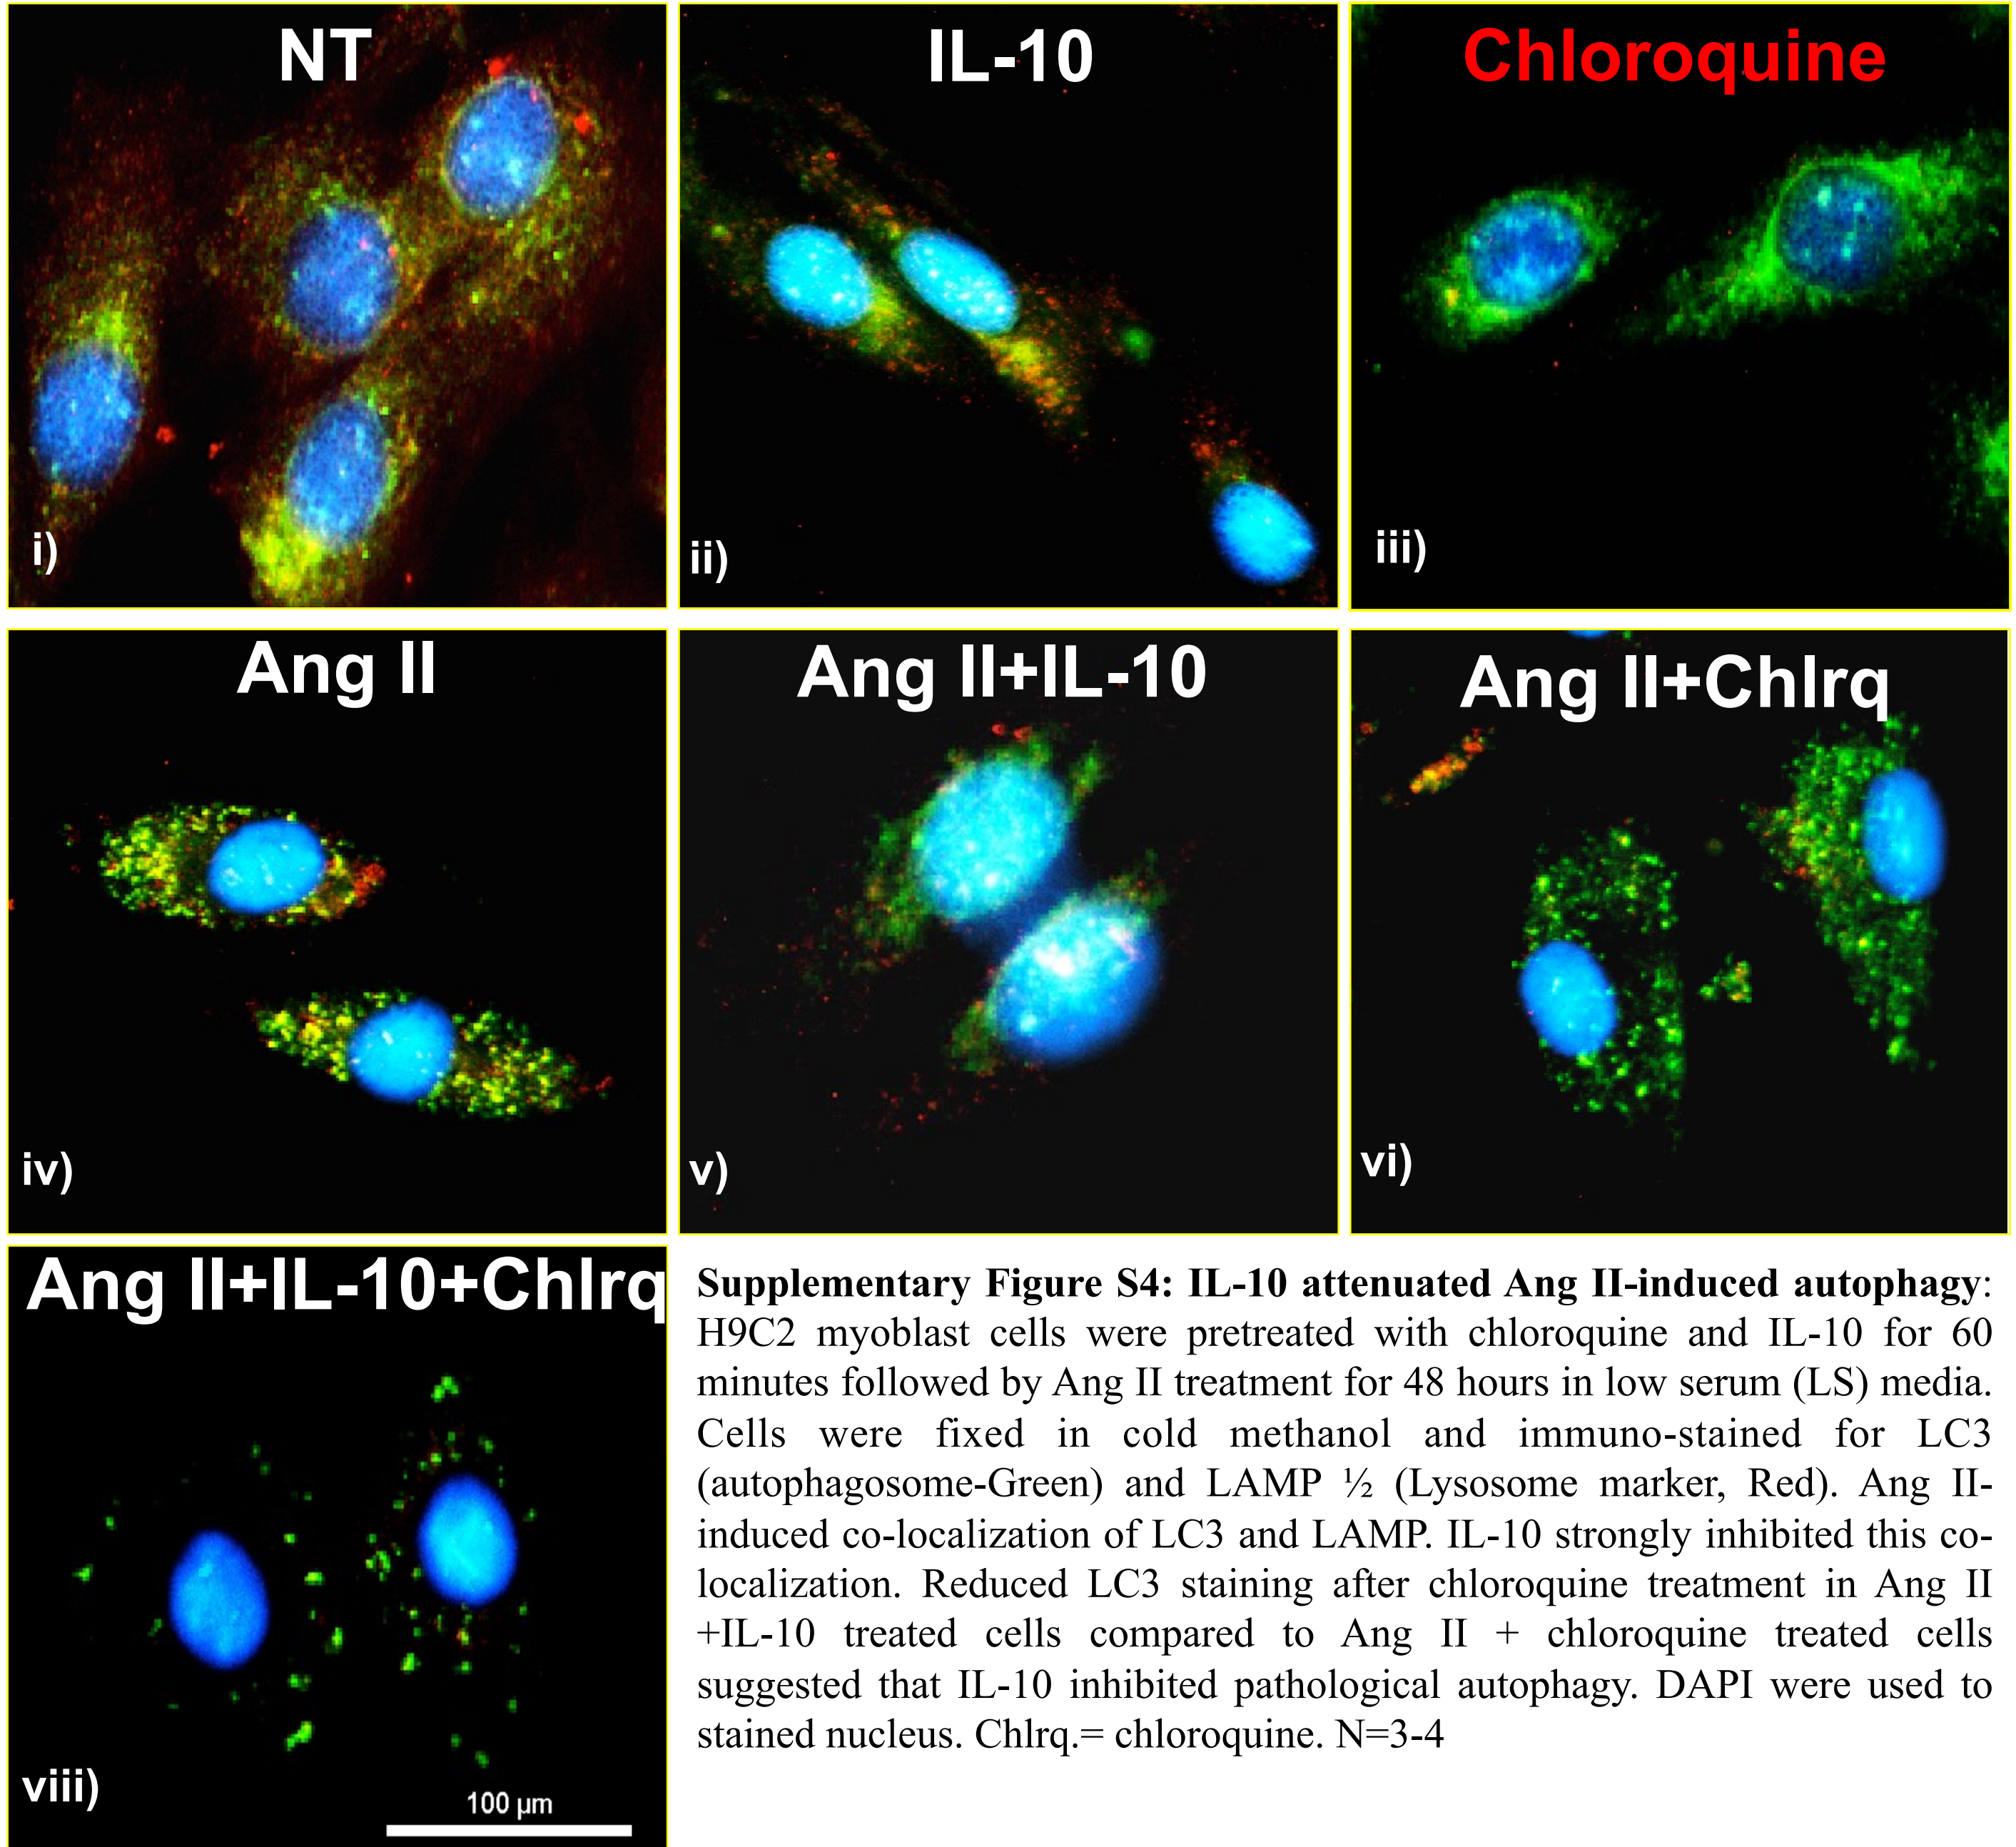

**Supplementary Figure S4: IL-10 attenuated Ang II-induced autophagy:** H9C2 myoblast cells were pretreated with chloroquine and IL-10 for 60 minutes followed by Ang II treatment for 48 hours in low serum (LS) media. Cells were fixed in cold methanol and immuno-stained for LC3 (autophagosome-Green) and LAMP ½ (Lysosome marker, Red). Ang II-induced co-localization of LC3 and LAMP. IL-10 strongly inhibited this co-localization. Reduced LC3 staining after chloroquine treatment in Ang II +IL-10 treated cells compared to Ang II + chloroquine treated cells suggested that IL-10 inhibited pathological autophagy. DAPI were used to stained nucleus. Chlrq.= chloroquine. N=3-4

## Supplementary Figure S5

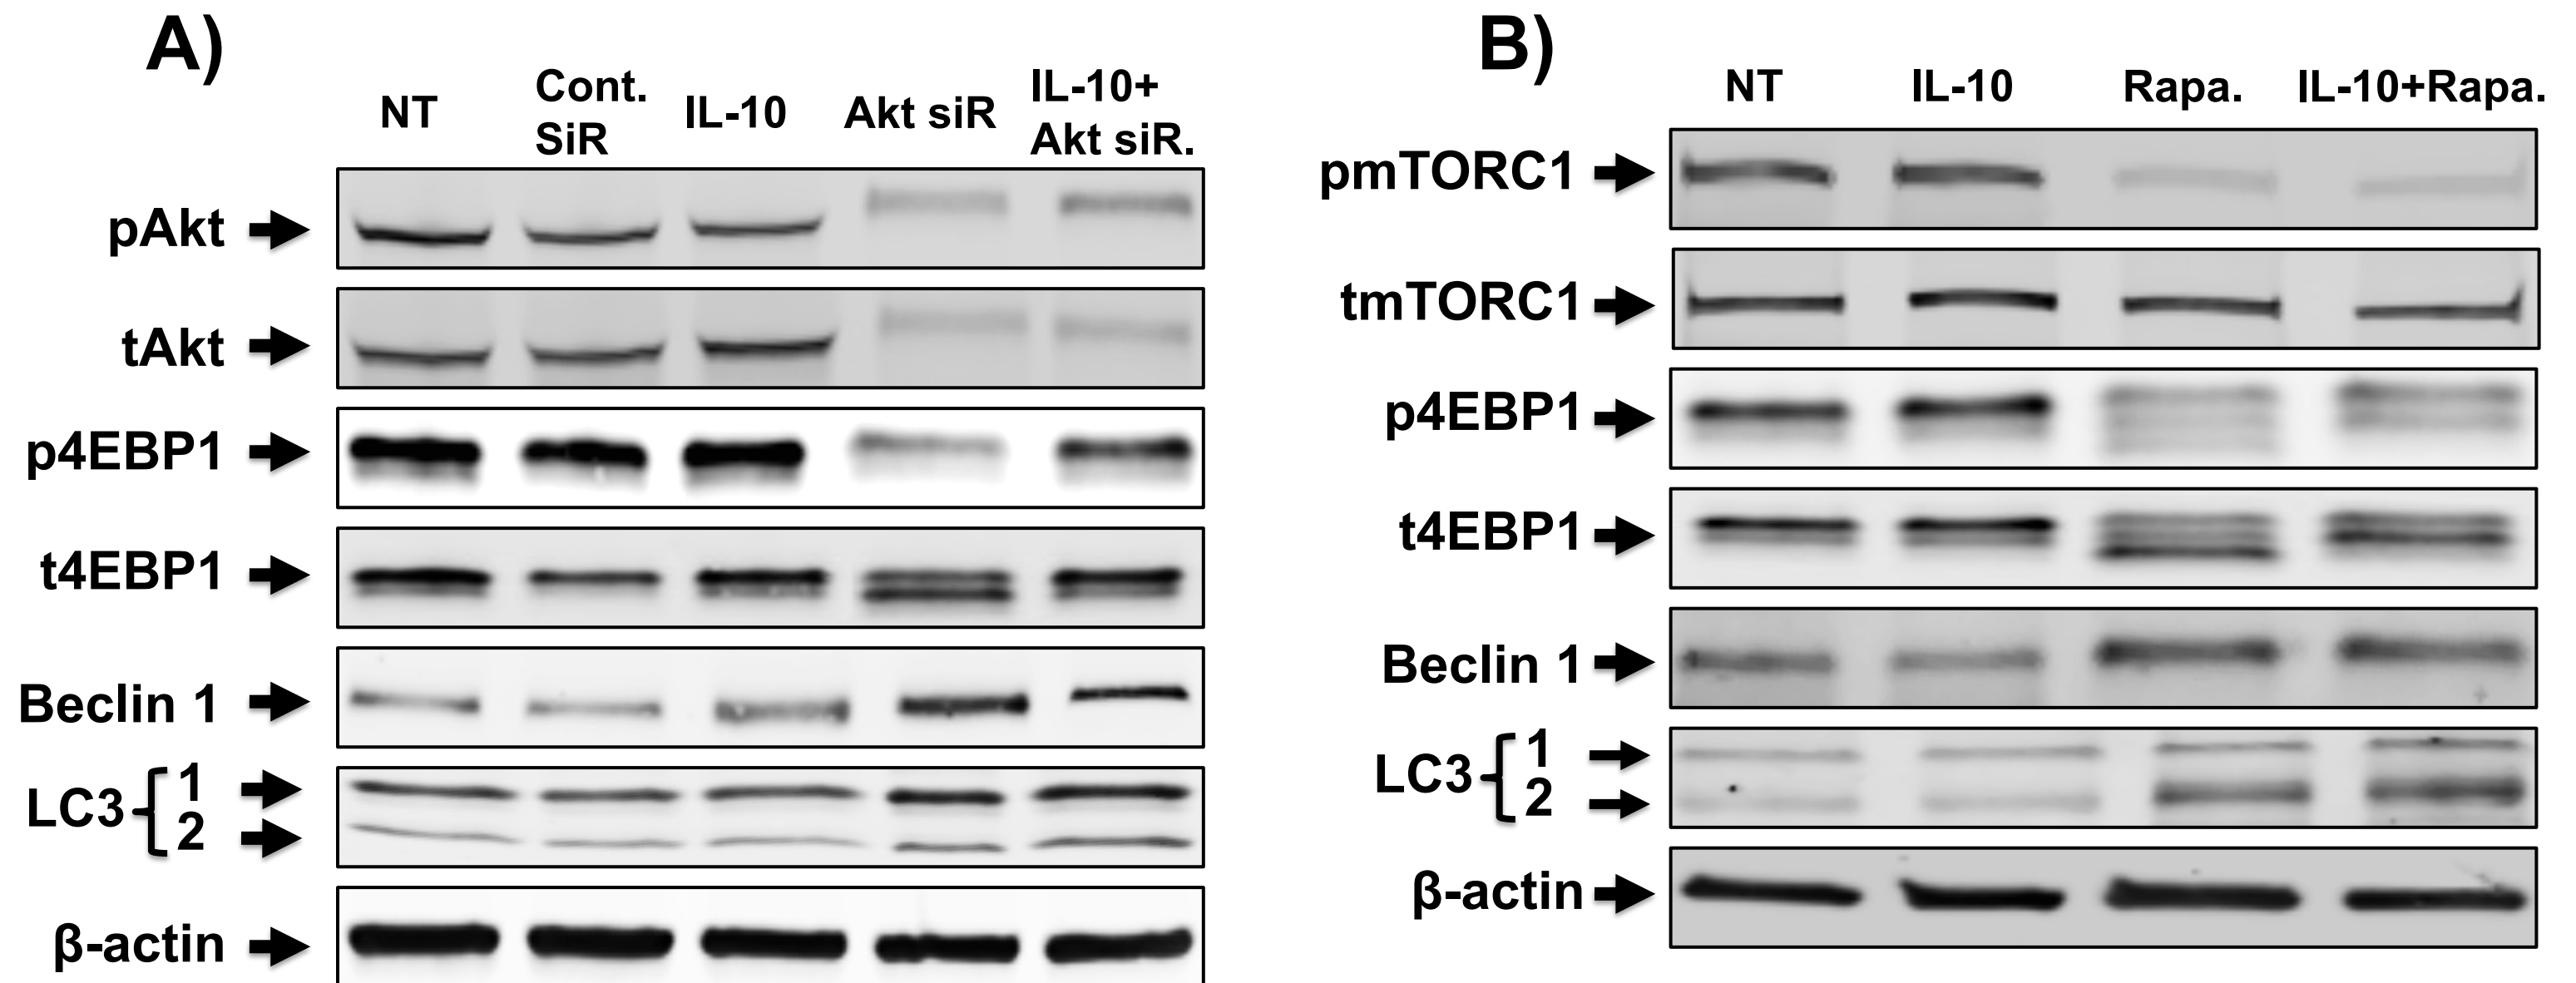

**Supplementary Figure S5: Rapamycin and Akt siR activates basal autophagy in neonatal rat ventricular myocytes (NRVM):** NRVM were isolated from 1-2 days old rat pups. Cells were treated with rapamycin or Akt siR and IL-10 as described in method. **A&B)** Cells lysate were prepared from cells after treatment and used for western blot. Inhibition of AKT/mTORC1 signaling activates autophagic markers. IL-10 treatment was unable to rescued this effect.  $\beta$ -actin were used as internal control. N=3



## Supplementary Figure S6

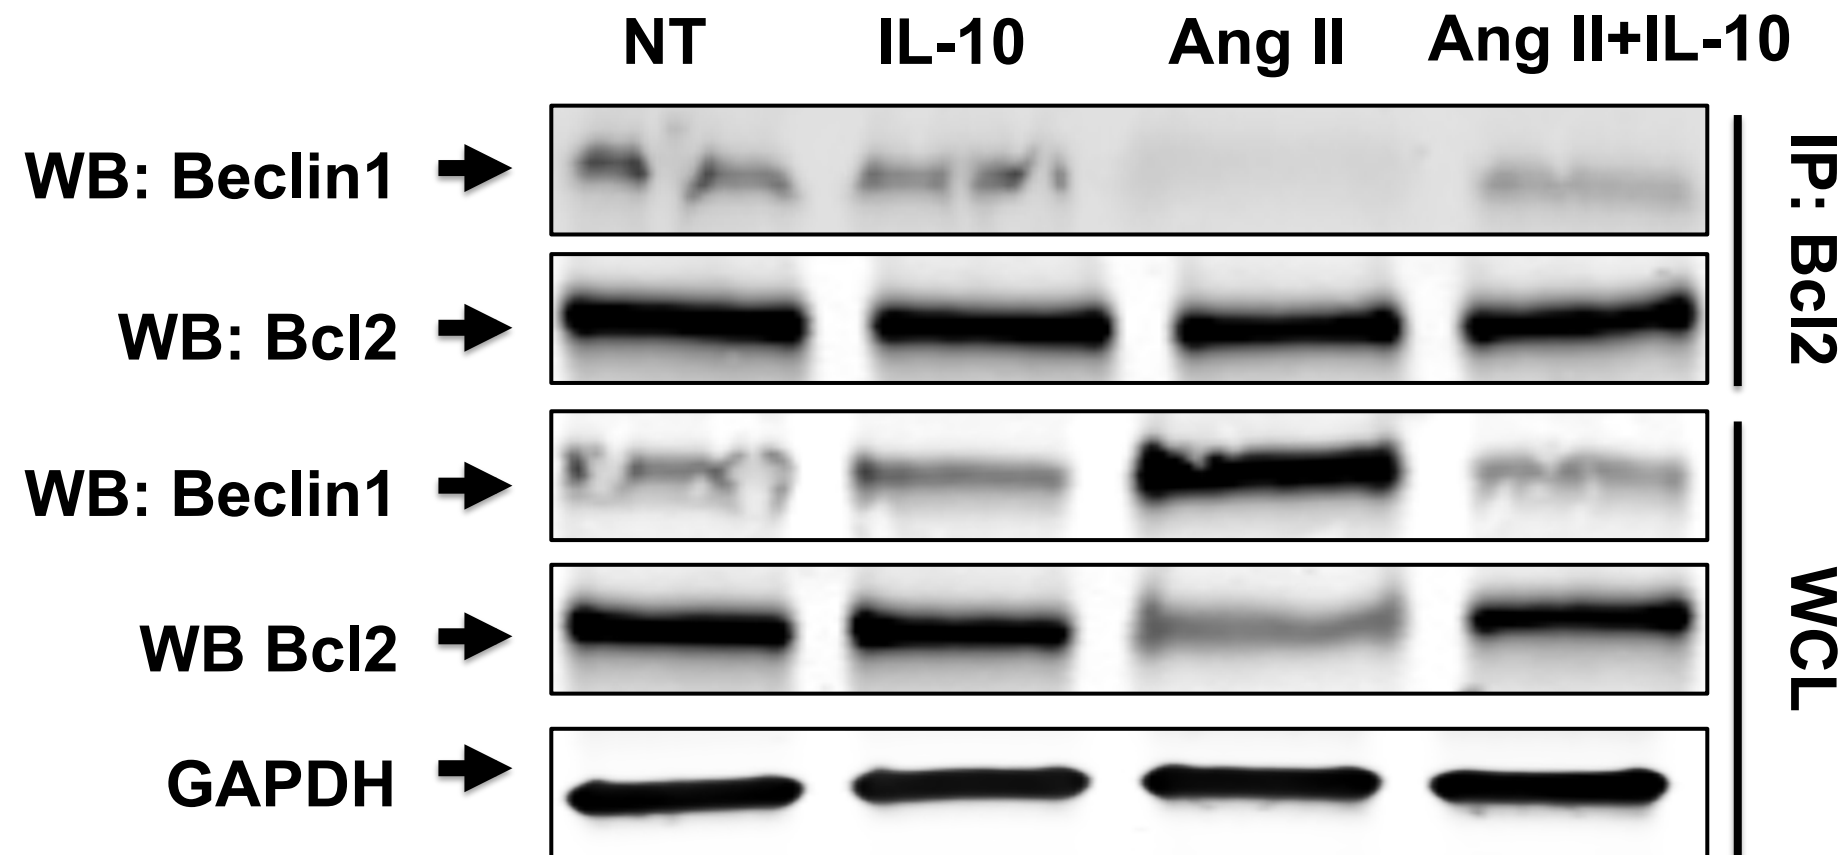

**Supplementary Figure S6: IL-10 restored physical association of Bcl2 with beclin 1 and thus reduced Ang II-induced autophagy:** Cells were lysed and used for co-immunoprecipitation (IP) using Pierce co-immunoprecipitation kit. Western blot was performed on immunoprecipitated proteins and whole cells lysate (WCL) for Bcl2 and beclin1. Co-immunoprecipitation data indicate IL-10-induced beclin1 association with bcl2.
